# Supplementary material for: <em>Sarcocystis neurona</em> Protein Kinases: Computational Identification, Evolutionary Analysis and Putative Inhibitor Docking
Source: Preprints.org preprint supplement (doi:10.20944/preprints201701.0040.v1), 2017-01-09
Supplement: Supplementary file 1 [file supplementary]

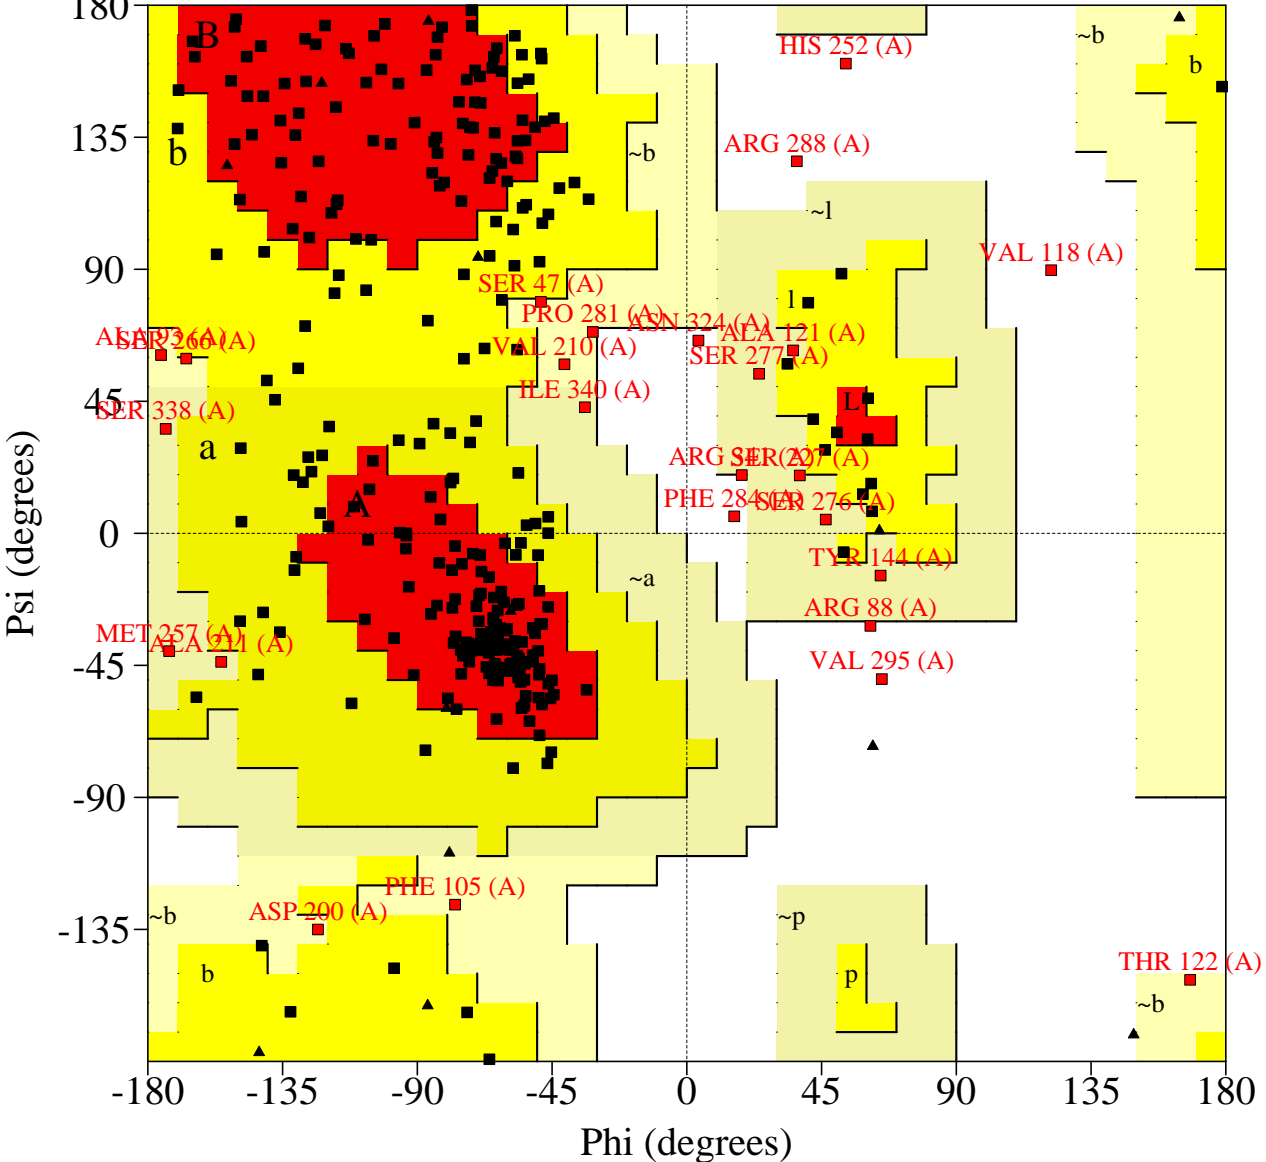

Plot statistics

|                                                      |     |        |
|------------------------------------------------------|-----|--------|
| Residues in most favoured regions [A,B,L]            | 199 | 65.7%  |
| Residues in additionally allowed regions [a,b,l,p]   | 80  | 26.4%  |
| Residues in generously allowed regions [~a,~b,~l,~p] | 16  | 5.3%   |
| Residues in disallowed regions                       | 8   | 2.6%   |
| -----                                                |     |        |
| Number of non-glycine and non-proline residues       | 303 | 100.0% |
| Number of end-residues (excl. Gly and Pro)           | 2   |        |
| Number of glycine residues (shown as triangles)      | 15  |        |
| Number of proline residues                           | 25  |        |
| -----                                                |     |        |
| Total number of residues                             | 345 |        |

Based on an analysis of 118 structures of resolution of at least 2.0 Angstroms and R-factor no greater than 20%, a good quality model would be expected to have over 90% in the most favoured regions.

FIGURE S1A

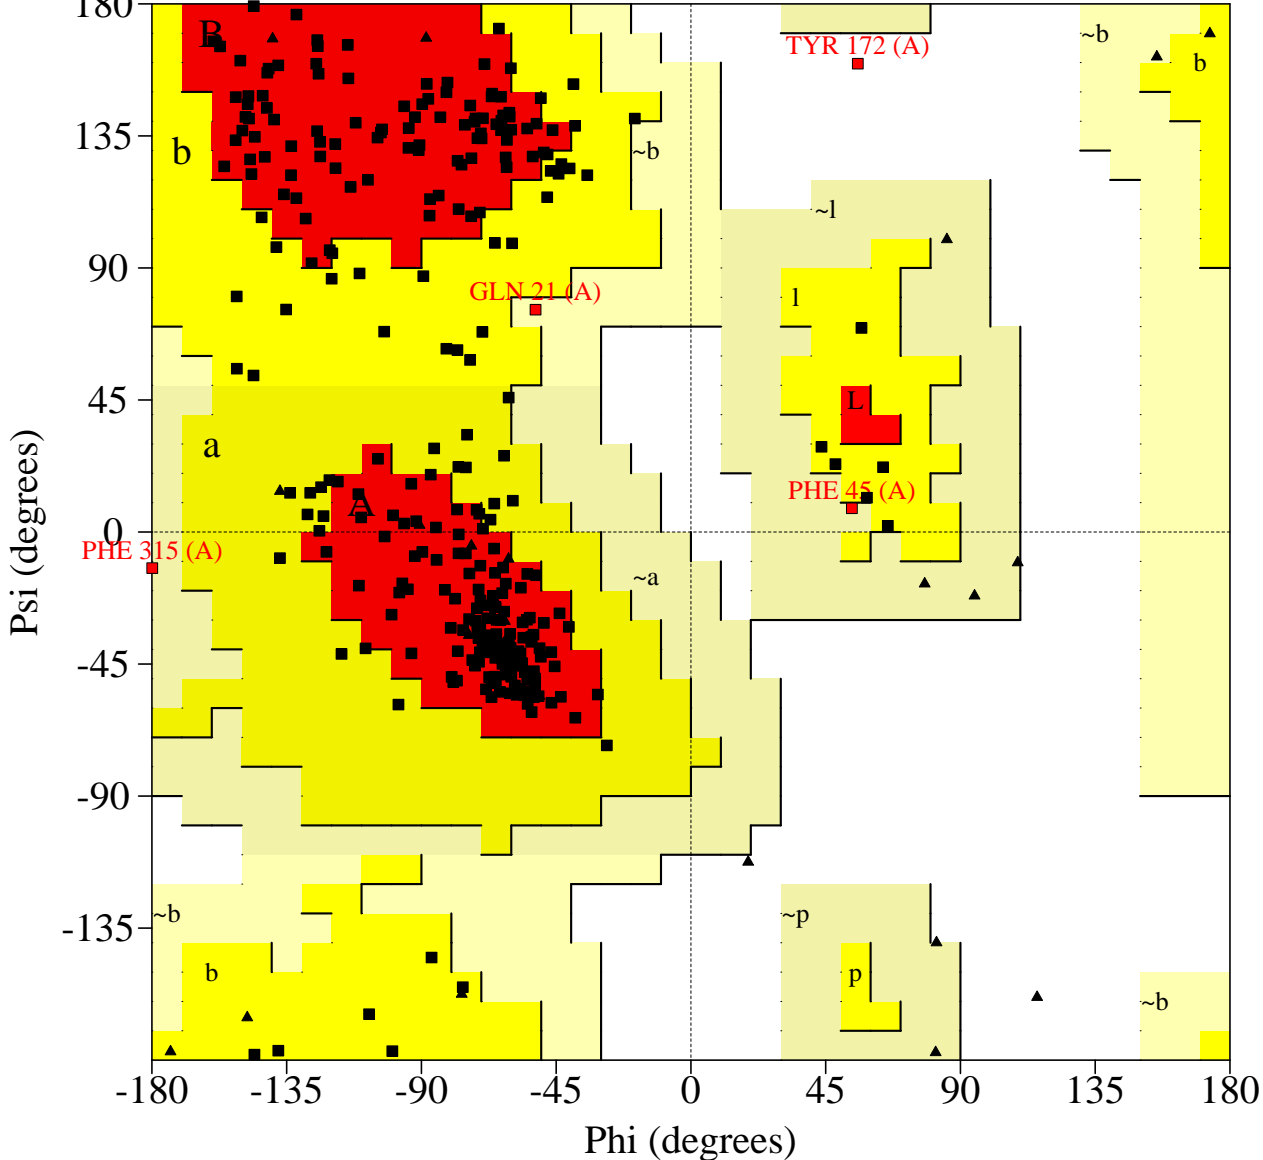

|                                                      |     |        |
|------------------------------------------------------|-----|--------|
| Residues in most favoured regions [A,B,L]            | 235 | 79.9%  |
| Residues in additional allowed regions [a,b,l,p]     | 55  | 18.7%  |
| Residues in generously allowed regions [~a,~b,~l,~p] | 3   | 1.0%   |
| Residues in disallowed regions                       | 1   | 0.3%   |
| -----                                                |     |        |
| Number of non-glycine and non-proline residues       | 294 | 100.0% |
| Number of end-residues (excl. Gly and Pro)           | 2   |        |
| Number of glycine residues (shown as triangles)      | 24  |        |
| Number of proline residues                           | 23  |        |
| -----                                                |     |        |
| Total number of residues                             | 343 |        |

Based on an analysis of 118 structures of resolution of at least 2.0 Angstroms and R-factor no greater than 20%, a good quality model would be expected to have over 90% in the most favoured regions.

**FIGURE S1B**
